# Supplementary material for: Association of SARS-CoV-2 Seropositivity and Symptomatic Reinfection in Children in Nicaragua
Source: PubMed Central journal article supplement (PMC9237791; doi:10.1001/jamanetworkopen.2022.18794), 2022-06-27

## Supplementary Online Content

Kubale J, Balmaseda A, Frutos AM, et al. Association of SARS-CoV-2 seropositivity and symptomatic reinfection in children in Nicaragua. *JAMA Netw Open*. 2022;5(6):e2218794. doi:10.1001/jamanetworkopen.2022.18794

**eMethods.** Case Definitions

**eTable 1.** Incidence of COVID-19 Associated Hospitalization

**eTable 2.** Symptom Presentation of COVID-19 Cases by Age

**eTable 3.** Risk of Moderate or Severe COVID-19 by Sero-status

**eTable 4.** SARS-CoV-2 Illness Severity

**eFigure 1.** IgG Titers by Sex

**eFigure 2.** Incidence Rate Ratios of COVID-19 Associated Hospitalization

This supplementary material has been provided by the authors to give readers additional information about their work.

**eMethods.** Case Definitions

| Term              |             | Definition                                                                                                                                                                                                                                                                                                                                                                                                                                                                                                                            |
|-------------------|-------------|---------------------------------------------------------------------------------------------------------------------------------------------------------------------------------------------------------------------------------------------------------------------------------------------------------------------------------------------------------------------------------------------------------------------------------------------------------------------------------------------------------------------------------------|
| COVID-19 case     |             | RT-PCR positive for SARS-CoV-2 and no prior positive within previous 59 days                                                                                                                                                                                                                                                                                                                                                                                                                                                          |
| Primary episode   |             | RT-PCR-confirmed case of COVID-19 in participant with no prior positive via PCR or ELISA<br>OR<br>RT-PCR-confirmed case of COVID-19 in participant with prior ELISA positive<br>AND<br>age <6 months at time of ELISA positive                                                                                                                                                                                                                                                                                                        |
| Secondary episode |             | RT-PCR-confirmed case of COVID-19 in participant with prior ELISA positive<br>AND<br>age ≥ 6 months at time of ELISA positive<br>OR<br>RT-PCR-confirmed case of COVID-19 in participant with prior RT-PCR-confirmed case of COVID-19 occurring >59 days prior.                                                                                                                                                                                                                                                                        |
| Severity          | Subclinical | No reported symptoms                                                                                                                                                                                                                                                                                                                                                                                                                                                                                                                  |
|                   | Mild        | 1 or more of the following symptoms: <ul style="list-style-type: none"> <li>• loss of taste</li> <li>• loss of smell</li> <li>• runny nose</li> <li>• cough</li> <li>• headache</li> <li>• sore throat</li> <li>• joint pain</li> <li>• fever</li> <li>• muscle pain</li> <li>• diarrhea</li> <li>• fatigue</li> <li>• rash</li> <li>• stayed in bed</li> <li>• conjunctivitis</li> <li>• congestion</li> <li>• itchy throat</li> <li>• loss of appetite</li> <li>• faintness</li> <li>• tight chest</li> <li>• chest pain</li> </ul> |
|                   | Moderate    | Any of the following symptoms: <ul style="list-style-type: none"> <li>• difficulty breathing</li> <li>• rapid breathing</li> <li>• shortness of breath</li> </ul>                                                                                                                                                                                                                                                                                                                                                                     |
|                   | Severe      | Transfer to hospital                                                                                                                                                                                                                                                                                                                                                                                                                                                                                                                  |
| Long COVID        |             | Participants with any symptom persisting for at least 28 days following illness onset for confirmed COVID-19                                                                                                                                                                                                                                                                                                                                                                                                                          |

**eTable 1.** Incidence of COVID-19 Associated Hospitalization

| <b>Characteristic</b>                                                        |             | <b>N(%)=12</b> | <b>Incidence Rate per 100 person-years</b> |
|------------------------------------------------------------------------------|-------------|----------------|--------------------------------------------|
| Male                                                                         |             | 7(58.3)        | 0.5 (0.2-1.1)                              |
| Female                                                                       |             | 5(41.7)        | 0.4 (0.1-0.9)                              |
| Age                                                                          | <2 years    | 7(58.3)        | 1.7 (0.7-3.5)                              |
|                                                                              | 2-4 years   | 3(25.0)        | 0.6 (0.1-1.6)                              |
|                                                                              | 5-9 years   | 2(16.7)        | 0.2 (0.03-0.8)                             |
|                                                                              | 10-14 years | 0              | --                                         |
| <sup>a</sup> 95% confidence intervals calculated using Poisson distribution. |             |                |                                            |

**eTable 2.** Symptom Presentation of COVID-19 Cases by Age

| <b>Characteristic</b> | <b>&lt;2 years,<br/>N = 66<sup>a</sup></b> | <b>2-4 years,<br/>N = 30<sup>a</sup></b> | <b>5-9 years,<br/>N = 52<sup>a</sup></b> | <b>10-14 years, N<br/>= 59<sup>a</sup></b> | <b>Overall,<br/>N = 207<sup>a</sup></b> |
|-----------------------|--------------------------------------------|------------------------------------------|------------------------------------------|--------------------------------------------|-----------------------------------------|
| Loss of taste         | 0 (0)                                      | 0 (0)                                    | 3 (5.8)                                  | 8 (14)                                     | 11 (5.3)                                |
| Loss of smell         | 0 (0)                                      | 0 (0)                                    | 3 (5.8)                                  | 11 (19)                                    | 14 (6.8)                                |
| Runny nose            | 48 (73)                                    | 26 (87)                                  | 37 (71)                                  | 44 (75)                                    | 155 (75)                                |
| Cough                 | 48 (73)                                    | 23 (77)                                  | 36 (69)                                  | 41 (69)                                    | 148 (71)                                |
| Headache              | 0 (0)                                      | 6 (20)                                   | 24 (46)                                  | 37 (63)                                    | 67 (32)                                 |
| Sore throat           | 3 (4.5)                                    | 7 (23)                                   | 26 (50)                                  | 28 (47)                                    | 64 (31)                                 |
| Fever/feverish        | 46 (70)                                    | 20 (67)                                  | 35 (67)                                  | 38 (64)                                    | 139 (67)                                |
| Joint pain            | 0 (0)                                      | 1 (3.3)                                  | 3 (5.8)                                  | 14 (24)                                    | 18 (8.7)                                |
| Muscle pain           | 0 (0)                                      | 2 (6.7)                                  | 6 (12)                                   | 15 (25)                                    | 23 (11)                                 |
| Diarrhea              | 19 (29)                                    | 3 (10)                                   | 10 (19)                                  | 6 (10)                                     | 38 (18)                                 |
| Vomiting              | 5 (7.6)                                    | 0 (0)                                    | 4 (7.7)                                  | 3 (5.1)                                    | 12 (5.8)                                |
| Fatigue               | 0 (0)                                      | 0 (0)                                    | 0 (0)                                    | 1 (1.7)                                    | 1 (0.5)                                 |
| Rash                  | 1 (1.5)                                    | 1 (3.3)                                  | 0 (0)                                    | 1 (1.7)                                    | 3 (1.4)                                 |
| Stayed in bed         | 0 (0)                                      | 0 (0)                                    | 1 (1.9)                                  | 1 (1.7)                                    | 2 (1.0)                                 |
| Conjunctivitis        | 0 (0)                                      | 0 (0)                                    | 0 (0)                                    | 0 (0)                                      | 0 (0)                                   |
| Congestion            | 30 (45)                                    | 14 (47)                                  | 23 (44)                                  | 23 (39)                                    | 90 (43)                                 |
| Itchy throat          | 1 (1.5)                                    | 0 (0)                                    | 3 (5.8)                                  | 5 (8.5)                                    | 9 (4.3)                                 |
| Loss of appetite      | 15 (23)                                    | 11 (37)                                  | 17 (33)                                  | 7 (12)                                     | 50 (24)                                 |
| Fainted               | 0 (0)                                      | 0 (0)                                    | 0 (0)                                    | 0 (0)                                      | 0 (0)                                   |
| Difficulty breathing  | 3 (4.5)                                    | 2 (6.7)                                  | 4 (7.7)                                  | 3 (5.1)                                    | 12 (5.8)                                |
| Rapid breathing       | 4 (6.1)                                    | 1 (3.3)                                  | 2 (3.8)                                  | 0 (0)                                      | 7 (3.4)                                 |
| Shortness of breath   | 0 (0)                                      | 0 (0)                                    | 1 (1.9)                                  | 2 (3.4)                                    | 3 (1.4)                                 |
| Chest tightness       | 1 (1.5)                                    | 0 (0)                                    | 0 (0)                                    | 1 (1.7)                                    | 2 (1.0)                                 |
| Chest pain            | 0 (0)                                      | 0 (0)                                    | 0 (0)                                    | 3 (5.1)                                    | 3 (1.4)                                 |
| <sup>a</sup> N(%)     |                                            |                                          |                                          |                                            |                                         |

**eTable 3.** Risk of Moderate or Severe COVID-19 by Serostatus

|                                                             | <b>N=10</b> | <b>Person-years</b> | <b>IRR<sup>a</sup></b> |
|-------------------------------------------------------------|-------------|---------------------|------------------------|
| Seropositive                                                | 5           | 578.2               | 0.9 (0.3-3.2)          |
| Seronegative                                                | 5           | 515.1               | --                     |
| <sup>a</sup> Incidence Rate Ratio (95% confidence interval) |             |                     |                        |

**eTable 4.** SARS-CoV-2 Illness Severity

| <b>Characteristic</b>                  |             | <b>Subclinical</b> | <b>Mild</b> | <b>Moderate</b> | <b>Severe</b> | <b>Total</b> |
|----------------------------------------|-------------|--------------------|-------------|-----------------|---------------|--------------|
| Female                                 |             | 409 (73.6)         | 131 (23.6)  | 11 (2.0)        | 5 (0.9)       | 556          |
| Male                                   |             | 382 (74.5)         | 112 (21.8)  | 12 (2.3)        | 7 (1.4)       | 513          |
| Age                                    | <2 years    | 128 (65.3)         | 58 (29.6)   | 3 (1.5)         | 7 (3.6)       | 196          |
|                                        | 2-4 years   | 148 (79.6)         | 32 (17.2)   | 3 (1.6)         | 3 (1.6)       | 186          |
|                                        | 5-9 years   | 254 (77.2)         | 65 (19.8)   | 8 (2.4)         | 2 (0.6)       | 329          |
|                                        | 10-14 years | 261 (72.9)         | 88 (24.6)   | 9 (2.5)         | 0 (0.0)       | 358          |
| Total                                  |             | 791 (74.0)         | 243 (22.7)  | 23 (2.2)        | 12 (1.1)      | 1069         |
| <sup>1</sup> Values correspond to N(%) |             |                    |             |                 |               |              |

**eFigure 1.** Anti SARS-CoV-2 IgG Titers by Sex

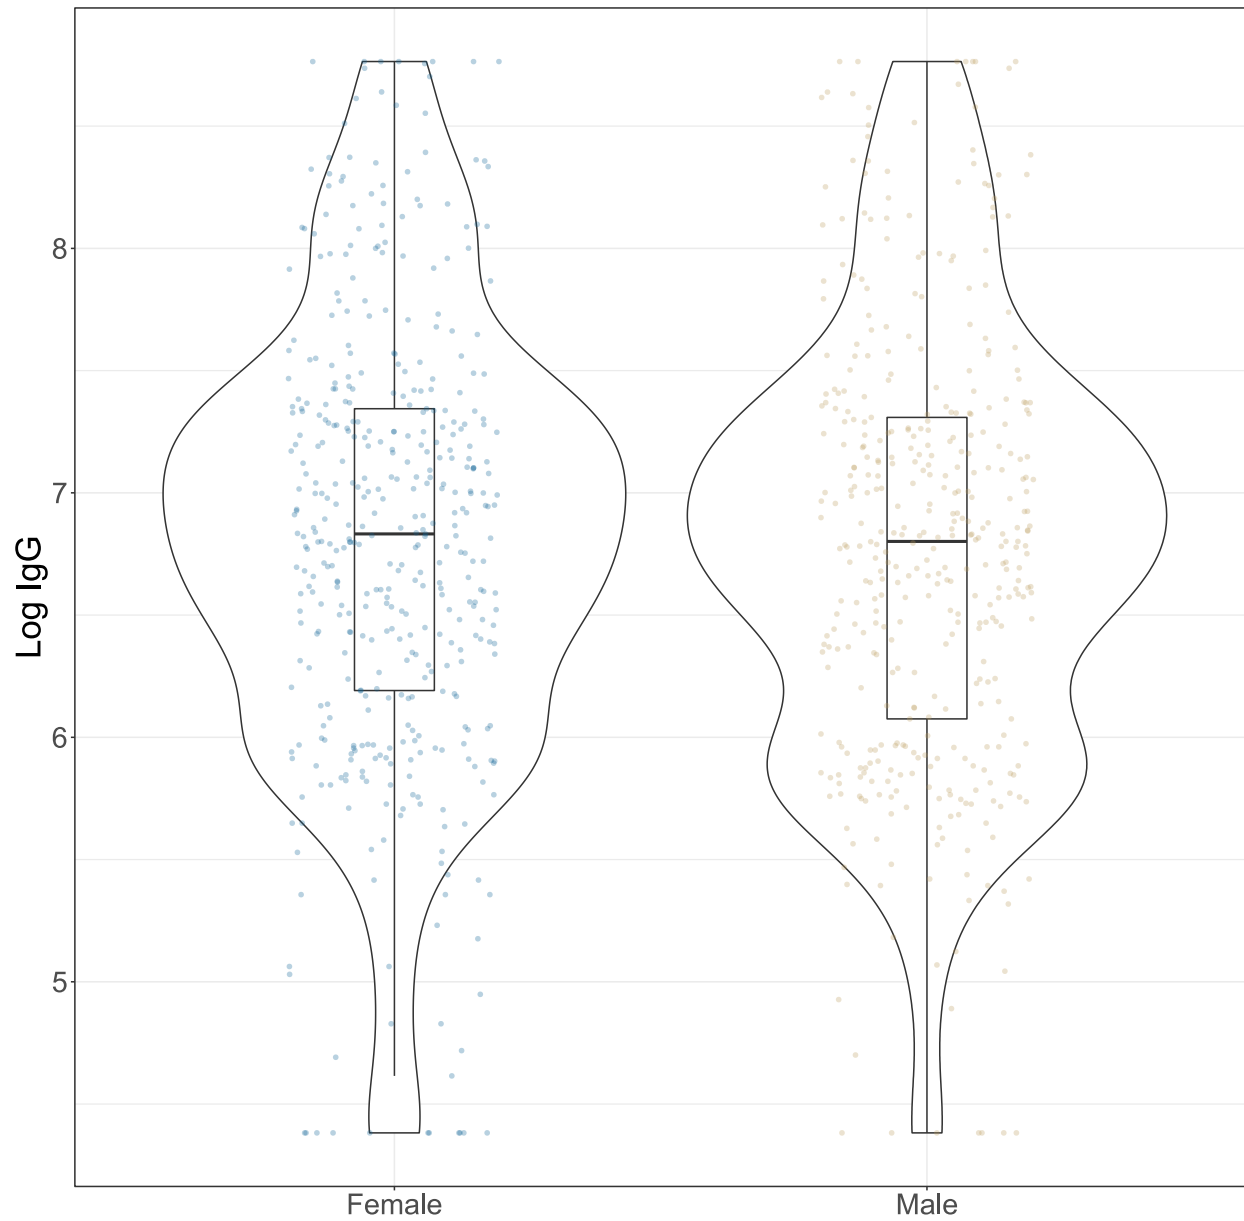

**eFigure 2.** Incidence Rate Ratios of COVID-19 Associated Hospitalization

Panel A shows the incidence rate ratios of COVID-19 associated hospitalization and associated 95% confidence intervals (CI) calculated using a generalized linear model (GLM) with a Poisson distribution and a categorical age variable as the predictor. We observed no COVID-19 associated hospitalizations in those aged 10-14 years so they were not included in the figure. Panel B shows the incidence rate ratio of COVID-19 associated hospitalizations and 95% CI comparing females to males using a GLM with a Poisson distribution and a categorical sex variable as the predictor.

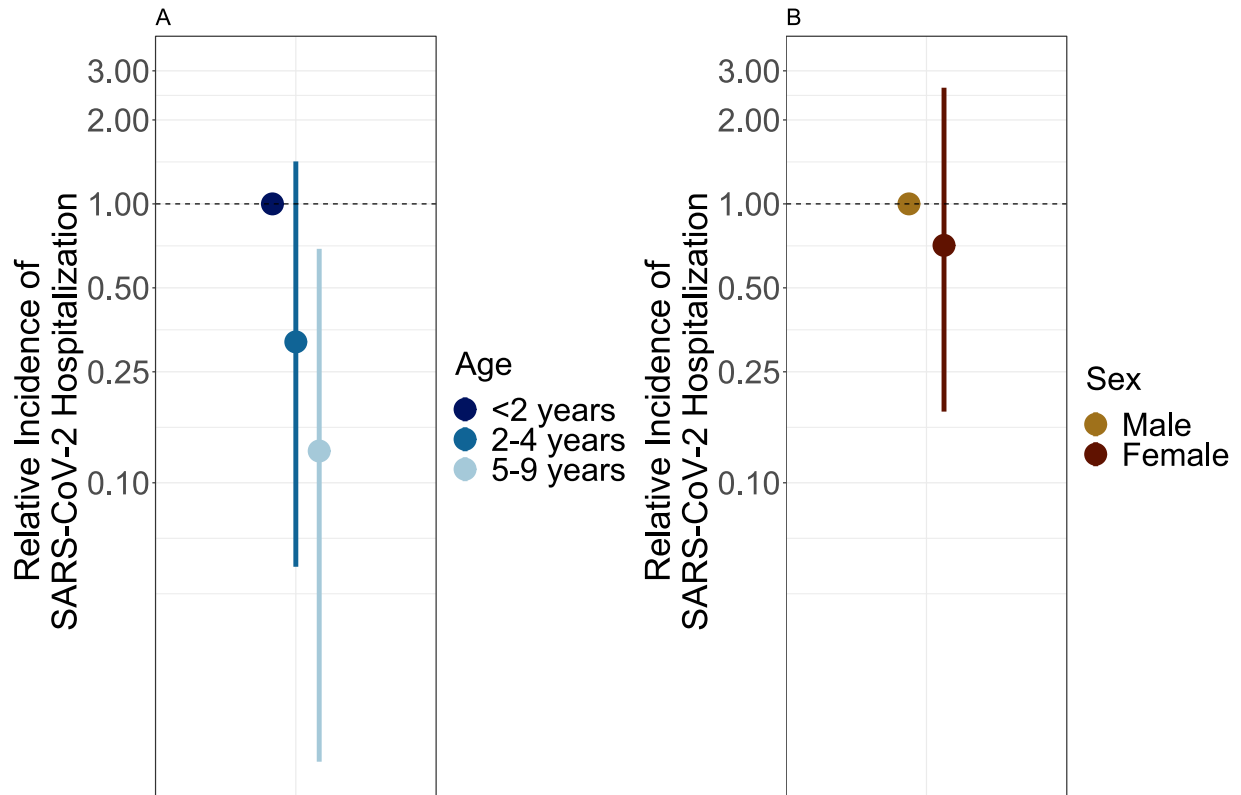

Supplement: jamanetwopen-e2218794-s001.pdf [file jamanetwopen-e2218794-s001.pdf]
